# Supplementary material for: Re-evaluating the link between the Laacher See volcanic eruption and the Younger Dryas
Source: Copernicus journal article supplement (doi:10.5194/cp-2017-147), 2017-11-16
Supplement: Supplementary file [file cp-2017-147-SC1-supplement.zip]

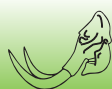

# The Lateglacial to early Holocene tephrochronological record from Lake Hämelsee, Germany: a key site within the European tephra framework

GWYDION JONES , CHRISTINE S. LANE, ACHIM BRAUER, SIWAN M. DAVIES, RENÉE DE BRUIJN, STEFAN ENGELS, ARITINA HALIUC, WIM Z. HOEK, JOSEF MERKT, DIRK SACHSE, FALKO TURNER AND FRIEDERIKE WAGNER-CREMER

## BOREAS

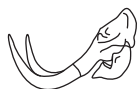

Jones, G., Lane, C. S., Brauer, A., Davies, S. M., de Bruijn, R., Engels, S., Haliuc, A., Hoek, W. Z., Merkt, J., Sachse, D., Turner, F. & Wagner-Cremer, F.: The Lateglacial to early Holocene tephrochronological record from Lake Hämelsee, Germany: a key site within the European tephra framework. *Boreas*. 10.1111/bor.12250. ISSN 0300-9483.

Here we present the results of a detailed cryptotephra investigation through the Lateglacial to early Holocene transition, from a new sediment core record obtained from Lake Hämelsee, Germany. Two tephra horizons, the Laacher See Tephra (Eifel Volcanic Field) and the Saksunarvatn Ash (Iceland), have been previously described in this partially varved sediment record, indicating the potential of the location as an important Lateglacial tephrochronological site in northwest Europe. We have identified three further tephra horizons, which we correlate to: the c. 12.1 ka BP Vedde Ash (Iceland), the c. 11 ka BP Ulmener Maar tephra (Eifel Volcanic Field) and the c. 10.8 ka BP Askja-S tephra (Iceland). Three additional cryptotephra deposits have been found (locally named HÄM\_T1616, HÄM\_T1470 and HÄM\_T1456-1455), which cannot be correlated to any known eruption at present. Geochemical analysis of the deposits suggests that these cryptotephra most likely have an Icelandic origin. Our discoveries provide age constraints for the new sediment records from Lake Hämelsee and enable direct stratigraphical correlations to be made with other tephra-bearing sites across Europe. The new tephrostratigraphical record, within a partially varved Lateglacial sediment record, highlights the importance of Lake Hämelsee as a key site within the European tephra lattice.

Gwydion Jones (554654@swansea.ac.uk) and Siwan M. Davies, Department of Geography, College of Science, Swansea University, Singleton Park, Swansea SA2 8PP, UK; Christine S. Lane, Department of Geography, University of Cambridge, Downing Place, Cambridge CB2 3EN, UK; Achim Brauer, Section 5.2 Climate Dynamics and Landscape Evolution, GFZ German Research Centre for Geosciences, Potsdam D-14473, Germany; Renée De Bruijn, Department of Physical Geography, Faculty of Geosciences, Utrecht University, Postbus 80.115, Utrecht 3508 TC, The Netherlands and Geological Survey of the Netherlands, Postbus 80015, Utrecht 3508 TA, The Netherlands; Stefan Engels, Centre for Environmental Geochemistry, School of Geography, Sir Clive Granger Building, University Park, Nottingham NG7 2RD, UK and Institute for Biodiversity and Ecosystem Dynamics (IBED), University of Amsterdam, Science Park 904, Amsterdam 1098 XH, The Netherlands; Aritina Haliuc, Department of Geography, University of Suceava, Suceava 720 229, Romania and Romanian Academy, Institute of Speleology, Cluj-Napoca 400006, Romania; Wim Z. Hoek and Friederike Wagner-Cremer, Department of Physical Geography, Faculty of Geosciences, Utrecht University, Postbus 80.115, Utrecht 3508 TC, The Netherlands; Josef Merkt, Ritter-Eccartstr 5, Herberlingen D-88518, Germany; Dirk Sachse, Section 5.1 Geomorphology, Organic Surface Geochemistry Laboratory, GFZ German Research Centre for Geosciences, Potsdam D-14473, Germany; Falko Turner<sup>†</sup>, Institute for Geosystems and Bioindication, Technische Universität Braunschweig, Braunschweig D-38106, Germany; received 4th January 2017, accepted 5th March 2017.

<sup>†</sup>Deceased

The study of past climate variability and environmental responses on local to global scales requires the comparison of palaeoclimatic and palaeoenvironmental records with robust and independently derived chronologies (Lowe *et al.* 2008; Blaauw *et al.* 2010). The detection of volcanic ash deposits (tephra) within sedimentary successions offers a powerful tool for dating (tephrochronology) and correlating (tephrostratigraphy) a range of palaeoenvironmental archives across the marine, terrestrial and glacial realms (Lowe 2011; Blockley *et al.* 2012). Consequently, tephra deposits are now widely sought and utilized as isochrons within palaeoclimate, palaeoecological and archaeological research (e.g. Fontijn *et al.* 2014; Barton *et al.* 2015; Davies 2015).

Following an eruption, tephra can be dispersed over large distances in the atmosphere before deposition. Undisturbed tephra deposits can be preserved as time-parallel marker horizons, or isochrons (Grange 1931; Uragami *et al.* 1933; Thórarinnsson 1944; Turney *et al.*

2004) as either visible or cryptic (not visible to the naked eye) layers. Far-travelled tephra deposits are composed almost entirely of glass shards, whose composition can be measured and used as a fingerprint to correlate a tephra to a specific eruption event or to other deposits from the same eruption. Tephrostratigraphical correlations may provide ages for a record, but most importantly they are a powerful stratigraphical tool, ideal for comparing the nature and timing of environment and ecosystem responses to climate forcing between sites, providing insight into climate-environment dynamics through time (e.g. Lane *et al.* 2013; Wulf *et al.* 2013; Rach *et al.* 2014).

Cryptotephra research has significantly advanced in recent decades and has been most widely applied within Europe and the North Atlantic seaboard, where numerous volcanic centres including Iceland, Eifel, Massif Central and Campi Flegrei (Fig. 1A) have been active throughout the late Quaternary. The abundance of tephra and cryptotephra studies in Europe has led to

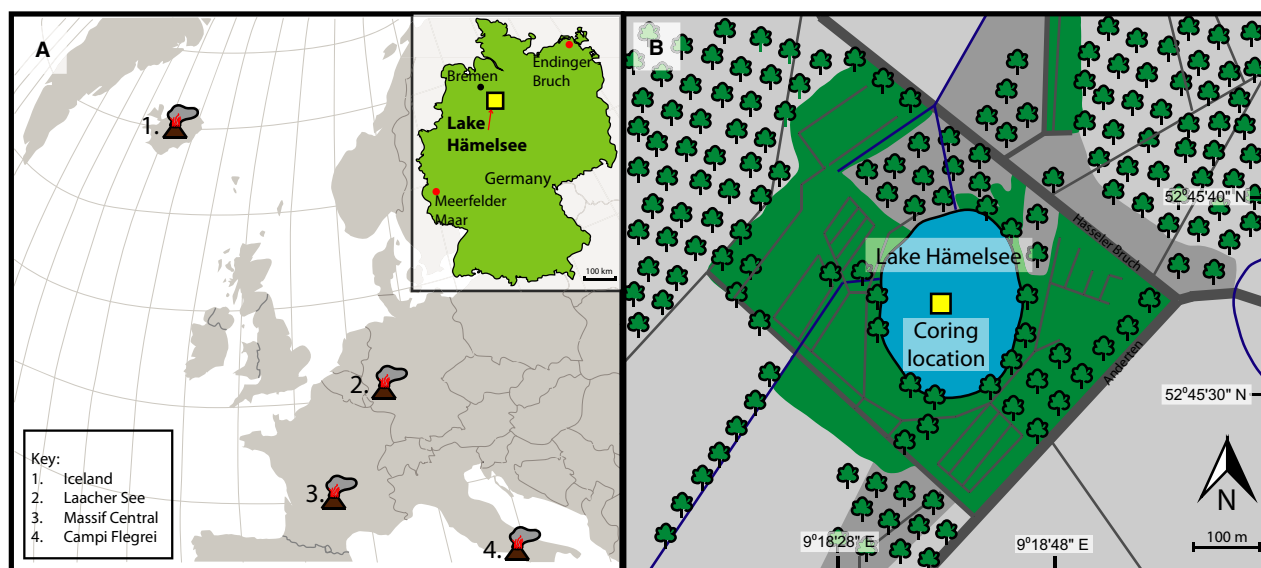

Fig. 1. A. Location map showing Lake Hämelsee, volcanic centres, and other sites mentioned in the text. B. Coring location and the surrounding catchment.

the establishment of a tephrostratigraphical framework, which uses tephra isochrons as a means to link sites together at fixed points in time, allowing chronological data to be shared and precise comparisons made (Bronk Ramsey *et al.* 2015a; Lowe *et al.* 2015). Key locations in such a framework are those with high-resolution chronologies, and those that record tephra deposits from multiple sources, enabling connections to be made across vast areas (Lane *et al.* 2015). One record that offers considerable potential in this regard is Lake Hämelsee in northern Germany (Fig. 1). The sedimentary record from Lake Hämelsee, published by Merkt & Müller (1999), is well known as a key record that tracks the impacts of Lateglacial climate change on northern European ecosystems and environments. Visible tephra has already been identified in the Hämelsee record, but this partially varved record has never been fully explored for the presence of cryptotephra.

The presence of tephra in the Hämelsee succession was first demonstrated by Merkt *et al.* (1993), who reported a microscopic tephra deposit, which was found in thin section, that they correlated to the *c.* 10.3 ka BP Icelandic Saksunarvatn Ash. The *c.* 12.9 ka BP Laacher See Tephra, from the Eifel region of Germany, was also identified as a visible deposit (Merkt *et al.* 1993; Merkt & Müller 1999). This central European site is ideally located to preserve tephra from multiple volcanic centres and this potential has recently been highlighted by research on Meerfelder Maar sediments, ~350 km to the southwest (Lane *et al.* 2015). As part of a wider project to re-evaluate this important archive in the context of Lateglacial records of past climate dynamics, this study explores the tephra record in order to provide age constraints and facilitate precise correlations with other European records.

## Study site

Lake Hämelsee, northern Germany (latitude 52°45'34" N, longitude 9°18'40" E, altitude 19.5 m a.s.l.), is located in the Weichselian fluvial sand plain of the Weser-Aller river system. The lake is almost circular (Fig. 1B), with a diameter of ~400 m and the maximum water depth of the lake currently is 4.9 m. It is a closed lake system, solely fed by precipitation and groundwater, making it a desirable site for a palaeoenvironmental study. The sedimentary succession studied by Merkt & Müller (1999) showed that sedimentation within the basin began during the Pleniglacial–Lateglacial transition and continued throughout the Holocene. The Lateglacial sediments are partially varved adding further value to the succession.

## Material and methods

A new sediment succession (HÄM13) was cored from Lake Hämelsee during the first *An INTIMATE Example* research training school in July 2013 ([www.intimate.nb.ku.dk/](http://www.intimate.nb.ku.dk/)), with the aim of constructing a detailed palaeoclimate record for the Lateglacial, using both traditional and state-of-the-art dating methods and proxy techniques. Using a piston-corer operated from a Uwitec coring platform, two parallel overlapping core successions (H1 and H2) were retrieved from the middle part of the lake at  $3.3 \pm 0.1$  m water depth (within 10 m of each other), to allow sufficient material for a multiproxy study. Cores (60 mm diameter) were retrieved in 3-m-long sections and cut into 1-m-long segments for transport in the field. The base of the lake fill and transition into underlying sandy fluvial sediments was reached at approximately 17 m sediment depth. The two cores have

been split in two halves, photographed and described, and the half core segments are stored at 4 °C in Utrecht and Potsdam for further research. Consequently, all sample depths have been correlated onto a composite-core depth scale using identifiable marker deposits and horizons observed through magnetic susceptibility, ITRAX XRF scans, loss-on-ignition (LOI) data and tephra deposits (A. Haliuc, unpublished). Based on the core descriptions, five lithozones have been distinguished (Fig. 2; A. Haliuc, unpublished), which along with the LOI data can be correlated to the original sediment succession studied by Merkt & Müller (1999).

To locate the depth intervals of the sediment cores that contain tephra shards, 10-cm-long continuous and contiguous samples of sediment were analysed between 1700 and 1300 cm in core H1 and between 1620 and 1300 cm in core H2 (all depths used in this paper refer to depth below the sediment/water-interface and are reported in cm). Samples were freeze-dried, weighed to 0.5 g, then ashed in a furnace at 550 °C to remove any organic material. The residue from the furnace was soaked in 10% HCl to eliminate any carbonates and then wet-sieved through first 80- $\mu$ m and then 25- $\mu$ m meshes. The 25–80  $\mu$ m fraction was density separated following the heavy liquid floatation methodology outlined by Turney (1998) and Blockley *et al.* (2005). The 2.3–2.5 g cm<sup>-3</sup> density fraction was mounted onto microscope slides in Canada Balsam. Where brown shards were encountered during microscopic inspection, the >2.5 g cm<sup>-3</sup> fraction was also mounted and tephra shards counted. A high-powered, polarizing microscope was used to identify and count the tephra glass shard concentrations (TSCs) for all samples, and quantified

as shards per 0.5 g of dry sediment. Where distinct peaks in tephra glass shard concentrations were revealed in the initial 10-cm sediment segments, 1-cm subsamples of the same intervals were retrieved to determine more precisely the position of the tephra horizon.

Samples preliminarily identified as tephra deposits based on the TSC profiles were prepared for geochemical analysis. Processing followed the same methodology as above, with the exclusion of the ashing step. For low-concentration tephra deposits (TSC <400 shards per 0.5 g) a micro-manipulator was used to pick out individual glass shards from the extracted residue (Lane *et al.* 2014). Glass shards were mounted in epoxy resin on 28×48 mm frosted microscope slides. To expose the glass shards in cross-section for analysis, samples were ground using progressively higher grades of silicon carbide paper. The exposed tephra shards were then polished using 9-, 6- and 1- $\mu$ m diamond suspension and a 0.3- $\mu$ m micro-polish.

The major and minor element compositions of the tephra glass shards were measured during three analytical sessions at the Tephra Analytical Unit at the University of Edinburgh, using a Cameca SX100 wavelength dispersive spectrometer electron microprobe (WDS EPMA). EPMA operating conditions, adapted from Hayward (2012), vary by beam size as follows: 5- $\mu$ m beam diameter: accelerating voltage, 15 kV; beam current, 2 nA for Na, K, Si, Al, Mg, Fe and Ca, 80 nA for Mn, Ti and P. 3- $\mu$ m beam diameter: accelerating voltage, 15 kV; beam current, 0.5 nA for Na and Al, 2 nA for K, Si, Mg, Fe and Ca, 60 nA for Mn, Ti and P. The 3- $\mu$ m beam was used for analyses where only small analysable areas of shards were exposed post grinding. No offsets

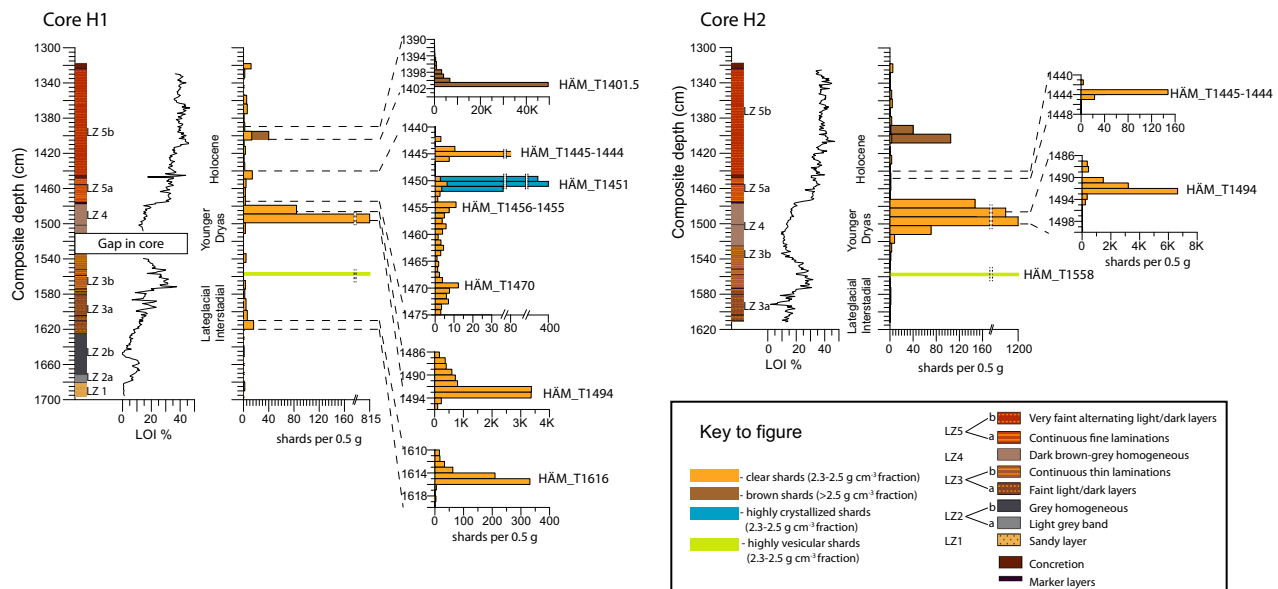

Fig. 2. Lithostratigraphy, loss on ignition, approximate depths for chronostratigraphical units and tephra shard concentrations (TSCs) (10- and 1-cm resolution) from cores H1 and H2 for Lake Hämelsee. Both profiles are plotted on the composite depth scale. LZ refers to the lithozones.



were observed between the 3- and 5- $\mu\text{m}$  setups (see Fig. S1). The internationally accepted Lipari and BCR2g secondary standards were analysed before, after and in-between sessions to examine the accuracy and the precision of the instrument and to allow comparison between data from each analytical period (following Kuehn *et al.* 2011). All geochemical data presented here, and those to which we compare to, are normalized to 100% totals. Raw data are available in Table S1.

Tephra glass shard major and minor element compositions were compared to available published data sets in order to find the best correlation for each tephra deposit. The most likely sources for tephra in Germany are Iceland, the Eifel, the Massif Central and Italian volcanoes (e.g. Lane *et al.* 2015); therefore, European databases were used (e.g. TephraBase (Newton *et al.* 2007) and the RESET database (Bronk Ramsey *et al.* 2015b)). However, cryptotephra from as far away as Alaska has also been identified in northern Germany (Jensen *et al.* 2014), and large eruptions from further afield were therefore also considered.

In order to evaluate the climatostratigraphical positions of the tephra layers in the Hämelsee succession, we use the LOI record alongside the lithostratigraphy (A. Haliuc, unpublished) to make a preliminary correlation to the original Hämelsee study of Merkt & Müller (1999). LOI was conducted on both cores H1 and H2, at centimetre resolution, following standard protocols (4 h at 550 °C) of Heiri *et al.* (2001). LOI results, plotted in Fig. 2, reveal a typical Lateglacial tripartite succession, picking out the fluctuating stadial and interstadial conditions that influenced deposition at the site prior to the Holocene onset.

## Results

Eight tephra deposits are identified in this succession. Our results confirm the presence of the Saksunarvatn Ash and the Laacher See Tephra within the Hämelsee succession, as first reported by Merkt *et al.* (1993). Six additional cryptotephra horizons have been located and three of these are correlated to known eruptions (Figs 2–5). All tephra deposits are named here after their depth in the composite core. Where a deposit has been identified in both H1 and H2, any differences in their occurrence are described. Here we present the TSC, shard morphology, geochemical composition (Table 1), and correlation to known eruptions for each tephra deposit, starting with the oldest.

### *HÄM\_T1616 (uncorrelated)*

The oldest tephra deposit, occurring between 1616–1615 cm with a TSC of 331 shards per 0.5 g, was found only in core H1 (Fig. 2), which reached deeper than H2. Shards are clear, with a fluted morphology. The shard concentration profile reveals a distinct basal peak, where we place the isochron, with a declining tail of shards above the peak up to 1610 cm (Fig. 2). Based on the comparison of H1 lithostratigraphy and LOI to Merkt & Müller (1999), this part of the succession is believed to correlate to the latter part of the Lateglacial Interstadial. Geochemical analysis revealed HÄM\_T1616 to be a rhyolitic tephra (Fig. 4A, B), with 72.8–74.7 wt% SiO<sub>2</sub>, 1.2–1.6 wt% FeO, 0.6–0.8 wt% CaO and 3.7–4.0 wt% K<sub>2</sub>O. HÄM\_T1616 has a similar compositional signa-

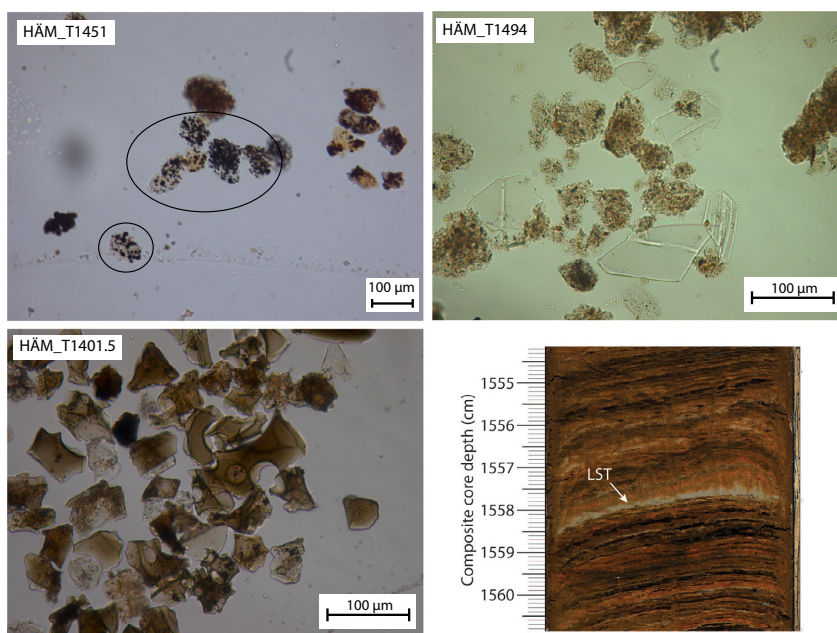

Fig. 3. Photographs of glass shards from samples HÄM\_T1451, HÄM\_T1401.5 and HÄM\_T1494 taken through a high-powered light microscope, illustrating morphological features, and image that shows the LST, which can be recognised as a continuous grey-coloured horizontal band in the Hämelsee cores. Picture taken using an ITRAX core scanner.

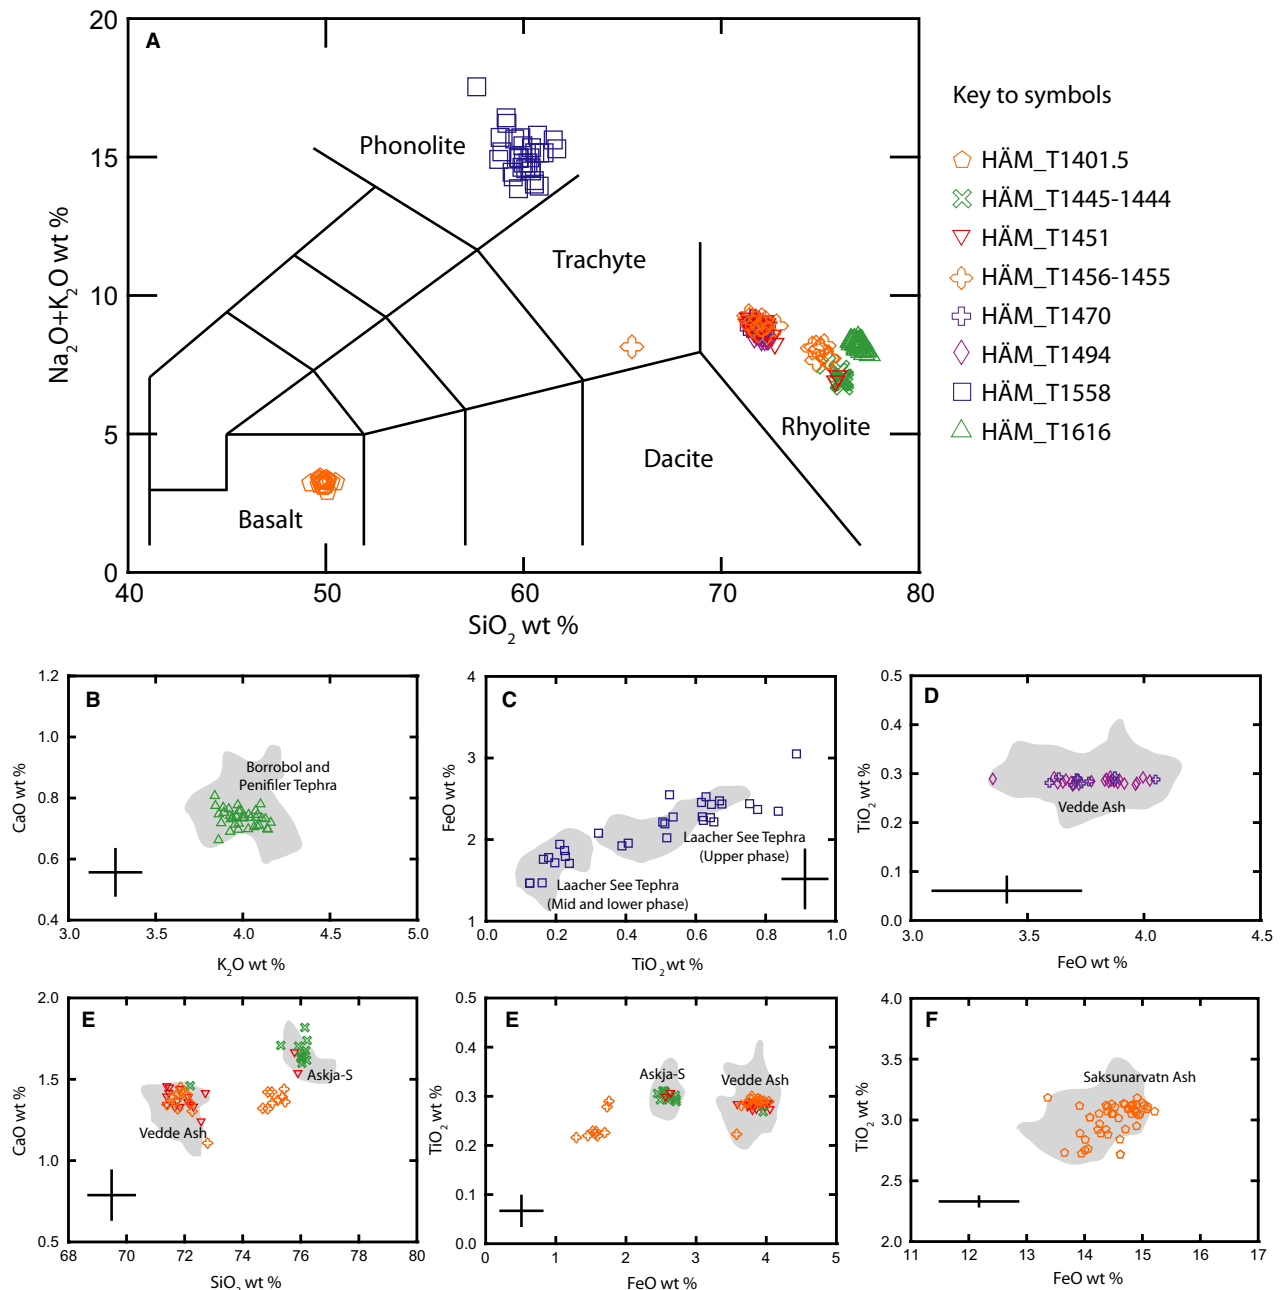

Fig. 4. Selected bi-plots showing tephra glass shard major element compositions. A. The full data set from the analysed tephra layers in Lake Hämelsee between 1700–1300 cm (composite depth), plotted using the Total Alkali Silica classification of Le Bas *et al.* (1986). B. The correlation of HÄM\_T1616 to the indistinguishable Borrobol and Penifiler tephra (data from Lind *et al.* 2016; Timms *et al.* 2016). C. The correlation of the phonolitic shards of HÄM\_T1558 to the Laacher See Tephra (data from Riede *et al.* 2011; Lane *et al.* 2012c). D. The correlation of HÄM\_T1494 and HÄM\_T1470 to the Vedde Ash (data from Lane *et al.* 2012a, c; MacLeod *et al.* 2014). E. Comparisons of HÄM\_T1456-1455 and reworked shards from HÄM\_T1451 to the Vedde Ash and Askja-S Tephra, demonstrating the correlation of HÄM\_T1445-1444 to the Askja-S Tephra (data from Lane *et al.* 2012c; Wulf *et al.* 2016; Timms *et al.* 2016). F. The correlation of the basaltic shards of HÄM\_T1401.5 to the Saksunarvatn Ash (data from Lind & Wastegård 2011; Davies *et al.* 2012; Bramham-Law *et al.* 2013). Error bar inserts show 2-sigma uncertainty range, based on precision of secondary standards (see Table S2).

ture to the Icelandic Borrobol (BT) and Penifiler (PT) tephra deposits (Fig. 4B). These tephra deposits are known to be compositionally indistinguishable and have both been found in a number of sites across northern Europe (Turney *et al.* 1997; Davies *et al.* 2003; Matthews

*et al.* 2011; Lind *et al.* 2016). Correlation to one or the other of these deposits is therefore reliant upon secure stratigraphical correlation to either the early part of the Lateglacial Interstadial (BT) or to the cold conditions of the Oldest Dryas that punctuate the interstadial in many

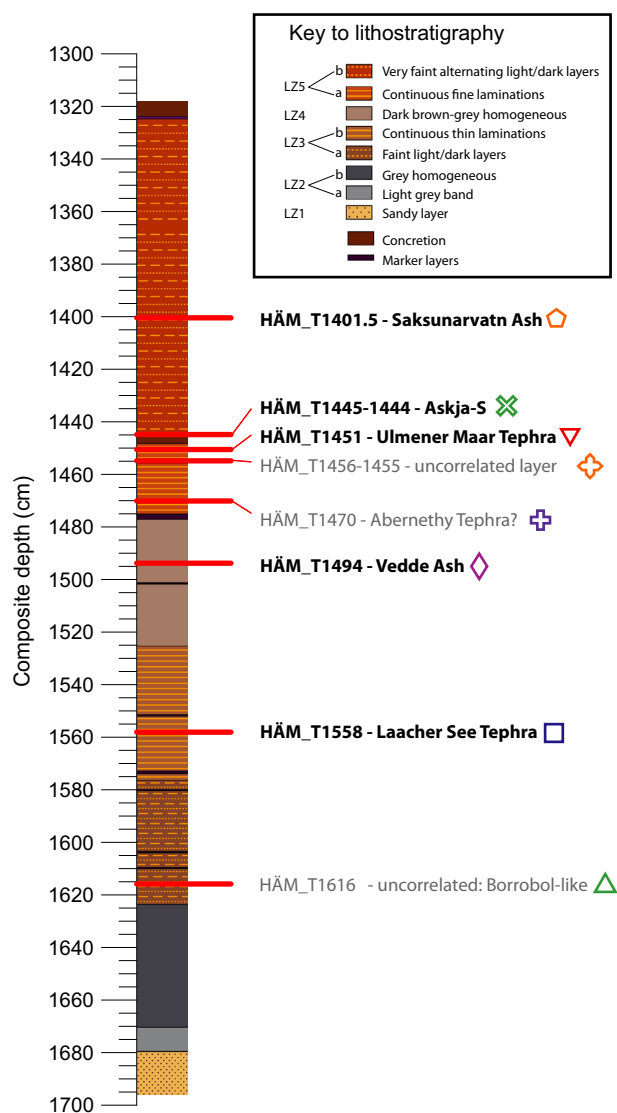

Fig. 5. Lake Hämelsee tephrostratigraphy between 1300–1700 cm composite depth plotted against lithostratigraphy. LZ refers to the lithozones. Tephra deposits are labelled according to the main text, along with the tephra correlation, and geochemical symbol as referred to in Figs 2 and 4.

records (PT). More recently, Timms *et al.* (2016) identified two more cryptotephra deposits, of the same composition as the BT and PT deposits, within a sediment record from Orkney (Scotland), which also lie in the latter part of the Interstadial. These deposits offer two additional possible matches for HÄM\_T1616. The difficulties of distinguishing between these Borrobol-like tephra deposits and the consequences for the Hämelsee succession are explored further within the Discussion section.

#### HÄM\_T1558 (*Laacher See Tephra*)

Tephra deposit HÄM\_T1558 is the only visible tephra deposit in the Hämelsee succession, occurring as a ~500- $\mu$ m-thick, light grey layer within the varved portion of the

Allerød sediments (Fig. 3) within both cores H1 and H2; slightly thicker than the ~200- $\mu$ m layer observed in the same position previously by Merkt & Müller (1999). Colourless, highly vesicular and cusped glass shards are confined almost entirely within two adjacent 1-cm samples (1559–1557 cm). In thin section the tephra layer is seen to occur above the winter-Chrysophyceae layer and below the next summer siderite layer, indicating an eruption that occurred between spring and early summer (Merkt & Müller 1999). HÄM\_T1558 has a phonolitic composition, with 56.8–60.6 wt% SiO<sub>2</sub>, 0.12–0.87 wt% TiO<sub>2</sub>, 18.8–21.0 wt% Al<sub>2</sub>O<sub>3</sub>, 1.4–3.0 wt% FeO and 6.3–8.0 wt% K<sub>2</sub>O, which correlates to the Laacher See Tephra (LST) (Fig. 4A, C), confirming the results of Merkt & Müller (1999). The LST originated from the Eifel region of Germany and is widely found within Central European archives, occurring consistently within the latest part of the interstadial (van den Bogaard & Schmincke 1985). The LST has been dated to 12 880±40 varve years (Brauer *et al.* 1999) in Lake Meerfelder Maar and to 12 937±23 cal. a BP in a multi-site Bayesian-based radiocarbon age model by Bronk Ramsey *et al.* (2015a). HÄM\_T1558 shows a predominant correlation to the upper phase of the LST, which was previously thought to have been dispersed in a southerly direction rather than northwards. Upper phase LST shards are also present in Wegliny, southwest Poland (Housley *et al.* 2013), further contradicting the previously thought dispersal axis of the upper phase LST. Some shards also show affinity to the mid and lower phase of the LST, as indicated by the FeO, TiO<sub>2</sub> and MgO values (Fig. 4C), suggesting that the dispersal of the phases may have been more widespread than previously thought.

#### HÄM\_T1494 (*Vedde Ash*)

HÄM\_T1494 is found within both cores approximately midway through sediments correlated to the Younger Dryas stadial. A TSC of 3360 shards per 0.5 g occurs in core H1 and 6640 shards per 0.5 g in core H2. The shard concentration profile has a sharp basal peak, with only a small number of shards penetrating to 2 cm below. The peak in glass shard concentrations is largely constrained within a 2-cm depth interval in both cores, with a gradually declining tail of shards observed above the peak. In core H1, glass shard concentrations do not drop below 10 shards per 0.5 g until 1476 cm, in line with the lithozone 4–5a transition (Fig. 2). Glass shards are platy and many have bubble junction features (Fig. 3). HÄM\_T1494 is rhyolitic, with 67.5–70.2 wt% SiO<sub>2</sub>, 3.2–3.9 wt% FeO, 1.3–1.5 wt% CaO and 3.2–3.5 wt% K<sub>2</sub>O (Fig. 4A, D). Based on its composition and stratigraphical position midway through the Younger Dryas, HÄM\_T1494 is correlated to the Vedde Ash, erupted from the Katla volcano in Iceland (Ruddiman & Glover 1972; Mangerud *et al.* 1984; Lacasse *et al.* 1995). The Vedde Ash has been dated to 12 121±114 b2k in the

Table 1. Summary of glass shard major element compositions, presented as means and SD (2 $\sigma$ ) values for each tephra deposit in the Lake Hämelsee record.

| Tephra                        | wt %          |                  |                  |                                |       |      |      |      |                   |                  |                               | Total |
|-------------------------------|---------------|------------------|------------------|--------------------------------|-------|------|------|------|-------------------|------------------|-------------------------------|-------|
|                               |               | SiO <sub>2</sub> | TiO <sub>2</sub> | Al <sub>2</sub> O <sub>3</sub> | FeO   | MnO  | MgO  | CaO  | Na <sub>2</sub> O | K <sub>2</sub> O | P <sub>2</sub> O <sub>5</sub> |       |
| HÄM_T1616                     | Mean (n = 37) | 73.67            | 0.11             | 11.90                          | 1.39  | 0.04 | 0.06 | 0.70 | 4.04              | 3.83             | 0.01                          | 95.73 |
|                               | 2 $\sigma$    | 0.92             | 0.01             | 0.36                           | 0.18  | 0.01 | 0.03 | 0.06 | 0.24              | 0.17             | 0.01                          | 1.04  |
| HÄM_T1558                     | Mean (n = 31) | 58.95            | 0.46             | 19.98                          | 2.08  | 0.22 | 0.22 | 1.48 | 7.85              | 6.97             | 0.05                          | 98.26 |
|                               | 2 $\sigma$    | 1.96             | 0.46             | 1.34                           | 0.74  | 0.13 | 0.24 | 0.74 | 2.58              | 1.35             | 0.06                          | 2.97  |
| HÄM_T1494                     | Mean (n = 23) | 69.02            | 0.27             | 12.79                          | 3.64  | 0.15 | 0.21 | 1.41 | 4.96              | 3.37             | 0.04                          | 95.86 |
|                               | 2 $\sigma$    | 1.25             | 0.01             | 0.52                           | 0.29  | 0.01 | 0.04 | 0.10 | 0.32              | 0.16             | 0.01                          | 1.63  |
| HÄM_T1470                     | Mean (n = 10) | 69.66            | 0.28             | 13.00                          | 3.65  | 0.14 | 0.21 | 1.32 | 5.22              | 3.40             | 0.04                          | 96.91 |
|                               | 2 $\sigma$    | 2.17             | 0.01             | 0.59                           | 0.28  | 0.01 | 0.03 | 0.11 | 0.27              | 0.23             | 0.01                          | 3.04  |
| HÄM_T1456-1455 (population 1) | Mean (n = 12) | 69.61            | 0.27             | 12.89                          | 3.69  | 0.14 | 0.19 | 1.31 | 5.20              | 3.44             | 0.04                          | 96.79 |
|                               | 2 $\sigma$    | 1.17             | 0.04             | 0.51                           | 0.28  | 0.02 | 0.08 | 0.18 | 0.25              | 0.23             | 0.01                          | 2.05  |
| HÄM_T1456-1455 (population 2) | Mean (n = 9)  | 71.93            | 0.23             | 12.90                          | 1.51  | 0.05 | 0.22 | 1.32 | 4.06              | 3.52             | 0.03                          | 95.77 |
|                               | 2 $\sigma$    | 1.12             | 0.05             | 0.49                           | 0.28  | 0.01 | 0.04 | 0.10 | 0.21              | 0.34             | 0.02                          | 1.26  |
| HÄM_T1456-1455 outlier        |               | 64.66            | 0.89             | 15.41                          | 4.80  | 0.17 | 1.23 | 3.20 | 5.18              | 2.87             | 0.33                          | 98.74 |
| HÄM_T1451 (population 1)      | Mean (n = 15) | 69.79            | 0.27             | 12.91                          | 3.74  | 0.15 | 0.21 | 1.33 | 5.17              | 3.47             | 0.04                          | 97.10 |
|                               | 2 $\sigma$    | 1.81             | 0.01             | 0.72                           | 0.30  | 0.02 | 0.07 | 0.13 | 0.50              | 0.13             | 0.01                          | 2.90  |
| HÄM_T1451 (population 2)      |               | 74.03            | 0.30             | 12.03                          | 2.58  | 0.09 | 0.25 | 1.63 | 4.14              | 2.61             | 0.04                          | 97.68 |
|                               |               | 73.79            | 0.29             | 11.89                          | 2.49  | 0.10 | 0.23 | 1.50 | 4.45              | 2.44             | 0.04                          | 97.21 |
| HÄM_T1445-1444                | Mean (n = 10) | 74.47            | 0.29             | 11.78                          | 2.55  | 0.08 | 0.24 | 1.64 | 4.31              | 2.55             | 0.05                          | 97.97 |
|                               | 2 $\sigma$    | 1.89             | 0.02             | 0.63                           | 0.15  | 0.01 | 0.05 | 0.12 | 0.50              | 0.12             | 0.02                          | 2.61  |
| HÄM_T1445-1444 outlier        |               | 70.58            | 0.26             | 12.57                          | 3.87  | 0.15 | 0.19 | 1.43 | 5.07              | 3.63             | 0.03                          | 97.77 |
| HÄM_T1401.5                   | Mean (n = 44) | 49.33            | 2.98             | 13.03                          | 14.36 | 0.23 | 5.51 | 9.86 | 2.74              | 0.46             | 0.31                          | 98.78 |
|                               | 2 $\sigma$    | 0.90             | 0.24             | 0.70                           | 0.87  | 0.02 | 0.50 | 0.44 | 0.32              | 0.07             | 0.04                          | 1.44  |

Greenland ice-cores (Mortensen *et al.* 2005; Rasmussen *et al.* 2006), to 12 140 $\pm$ 43 varve years BP in Meerfelder Maar (Lane *et al.* 2015) and to 12 023 $\pm$ 43 cal. a BP by Bronk Ramsey *et al.* (2015a).

#### *Tephra occurrences between 1475–1449 cm*

In lithozone 5a, tephra glass shards are present in variable TSCs of <12 shards per 0.5 g up until the next distinct deposit, HÄM\_T1451 (described below). Lithozone 5a is correlated to the early Holocene at Hämelsee (Fig. 2). Whilst these concentrations are low, the demonstrated occurrence of tephra horizons in other sites across Europe during this time (e.g. the Hässeldalen and Askja-S tephra deposits; Sigvaldason 2002; Lane *et al.* 2012c; Wulf *et al.* 2016) justified investigation of this interval at 1-cm resolution.

Three small peaks, which stood out above the background, were selected between 1449 and 1475 cm (Fig. 2) for geochemical analysis. These were HÄM\_T1470, HÄM\_T1456-1455 and HÄM\_T1451. Adjacent samples HÄM\_T1456 and HÄM\_T1455 were processed separately, but are treated below as a single sample.

*HÄM\_T1470 (uncorrelated).* – This small peak has a TSC of 12 shards per 0.5 g, lies 23 cm above the Vedde Ash horizon (HÄM\_T1494) and is located in the early

Holocene sediments. Glass shards are clear, with platy morphologies. Their rhyolitic composition is indistinguishable from that of HÄM\_T1494 (correlated to the Vedde Ash; Fig. 4D). A number of tephra deposits have been found in other European Lateglacial successions that have glass shard compositions that are indistinguishable from the Vedde Ash (Lane *et al.* 2012a). Most notable is the Abernethy Tephra, which has been identified lying close to the transition between the Younger Dryas and early Holocene (Matthews *et al.* 2011; MacLeod *et al.* 2015) and dated to 11 462 $\pm$ 122 cal. a BP (Bronk Ramsey *et al.* 2015a). The correlation of HÄM\_T1470 to Abernethy Tephra, however, remains tentative and questionable, due to the continued occurrence of shards of Vedde Ash composition right up until the start of the early Holocene in the Hämelsee record (see Discussion).

*HÄM\_T1456-1455 (uncorrelated).* – A TSC of 11 shards per 0.5 g was counted between 1556–1555 cm depth, with seven shards per 0.5 g in the overlying sample. Glass shards are clear and have platy morphology. Both samples were picked and analysed and both contain mixed populations of tephra. Across the 2-cm interval three compositional populations were observed. Population 1 contains 12 shards, which are indistinguishable from HÄM\_T1494 (correlated to the Vedde



Ash). Population 2 contains nine shards, which have a rhyolitic composition with 71.3–72.5 wt% SiO<sub>2</sub>, 12.8–13.5 wt% Al<sub>2</sub>O<sub>3</sub>, 1.5–1.7 wt% FeO but are uncorrelated and may represent a previously unknown eruption, probably of Icelandic origin (Fig. 4E). This population could be an additional isochronous marker for the early Holocene. The third population is represented by just one analysed shard, with a distinct trachytic composition, with 64.7 wt% SiO<sub>2</sub>, 0.9 wt% TiO<sub>2</sub>, 15.4 wt% Al<sub>2</sub>O<sub>3</sub>, 1.2 wt% MgO. A trachytic tephra is most likely from a non-Icelandic volcanic origin; however, no matching tephra composition has yet been found and this shard remains uncorrelated (Fig. 4A).

*HÄM\_T1451 (Ulmener Maar).* – Tephra deposit HÄM\_T1451 consists of shards with two types of morphology. A TSC of six clear, platy shards per 0.5 g and 389 highly crystallized particles per 0.5 g was observed (Fig. 2). WDS-EPMA was only undertaken on the clear platy shards, of which 17 were analysed, revealing two populations with distinct chemical compositions. Population 1 contains 15 shards, which are indistinguishable from HÄM\_T1494 (correlated to the Vedde Ash) and population 2 contains two shards, which are indistinguishable from HÄM\_T1445–1444 (described below) (Fig. 4E). The highly crystallized particles are largely isotropic but the shape tends to be more rounded/subangular, indicating formation from a crystal rich melt (Fig. 3). Whilst WDS-EPMA was not possible on these particles, they appear highly similar to tephra particles from the *c.* 11 ka BP Ulmener Maar Tephra (UMT) observed in Meerfelder Maar and at other sites in western Germany (Zolitschka *et al.* 1995; Brauer *et al.* 1999; Lane *et al.* 2015). Based upon the morphological similarity and corresponding stratigraphical position at the onset of the Holocene, the main population of glass shards in HÄM\_T1451 is correlated to the UMT.

#### *HÄM\_T1445–1444 (Askja-S)*

This tephra deposit was found in both cores, with a concentration of 73 shards per 0.5 g in core H1 and 148 shards per 0.5 g in core H2. Glass shards are clear and have platy and fluted morphologies. The shard concentration profile shows a sharp peak at 1445–1444 cm depth with a small amount of shards 1 cm below and above. Geochemical analysis was only undertaken on the tephra deposit in core H1 and revealed a rhyolitic tephra with 73.0–76.0 wt% SiO<sub>2</sub>, 2.5–2.7 wt% FeO, 1.6–1.8 wt% CaO, 2.5–2.7 wt% K<sub>2</sub>O (Fig. 4A, E), correlating to the Askja-S tephra. The age of the Askja-S tephra was modelled by Bronk Ramsey *et al.* (2015a) to 10 830±57 cal. a BP; however, based on a varve-interval from the Hässeldalen tephra in Lake Czechowskie, Poland, Ott *et al.*

(2016) provided an older age of 11 228±26 cal. a BP. Our results confirm that the Askja-S tephra is younger than the Ulmener Maar tephra, suggesting that the Ott *et al.* (2016) age estimate may be marginally too old. However, due to the centennial-scale uncertainties on individual ages for the Hässeldalen and Ulmener Maar tephras, we cannot yet resolve a more precise age of the Askja-S tephra.

#### *HÄM\_T1401.5 (Saksunarvatn Ash)*

The uppermost tephra deposit, visible in thin section analysis, has a very high TSC of 49 554 shards per 0.5 g (>2.5 g cm<sup>-3</sup> density fraction). Glass shards are brown and have blocky morphologies (Fig. 3). The shard concentration profile has a sharp basal peak with no glass shards below. Gradually decreasing shard concentrations are observed up to 1394 cm. Consistent with the findings of Merkt *et al.* (1993), geochemical analysis reveals a basaltic composition, with 48.5–50.4 wt% SiO<sub>2</sub>, 2.7–3.2 wt% TiO<sub>2</sub>, 13.6–15.1 wt% FeO, 9.5–10.4 wt% CaO (Fig. 4A, F), correlating with published data from the Saksunarvatn Ash. The Saksunarvatn Ash has been found in several terrestrial sites in Europe (Waagstein & Jóhansen 1968; Mangerud *et al.* 1986; Timms *et al.* 2016), and several marine cores in the North Atlantic including LINK 14:185 (Rasmussen *et al.* 2011; Davies *et al.* 2012). A tephra deposit of the same major element composition has also been identified in the GRIP ice-core (Grönvold *et al.* 1995; Davies *et al.* 2012) with an age of 10 297±45 b2k (Rasmussen *et al.* 2006). However, Davies *et al.* (2012) demonstrated a compositional difference between the tephra in GRIP and LINK 14:185 based on trace element data, which may suggest two separate eruptions occurred closely spaced in time, with two ash plumes directed in opposite directions to one another. Consequently, HÄM\_T1401.5 is correlated to the eruption that dispersed ash in a southeasterly direction, as initially recognised by Mangerud *et al.* (1984). The Saksunarvatn Ash has been dated at Kråkenes to 10 210±35 cal. a BP (Lohne *et al.* 2014).

## Discussion

### *The tephra record in Hämelsee: chronological markers and correlation to other sites*

In total, five tephra deposits in the Hämelsee record are now described and correlated to known eruptions (Fig. 5). Based on both their stratigraphical position and glass shard compositions HÄM\_T1558 has been correlated to the LST, HÄM\_T1494 to the Vedde Ash, HÄM\_T1445–1444 to the Askja-S tephra and HÄM\_T1401.5 to the Saksunarvatn Ash. Whilst we were unable to measure the glass shard composition, we have also identified the first cryptotephra deposit of the Ulmener



Table 2. Tephra correlations and published age estimates for the correlated tephra deposits found within the Lake Hämelsee record.

| Tephra         | Correlation         | Age estimate                                                      | Reference                                                                                         |
|----------------|---------------------|-------------------------------------------------------------------|---------------------------------------------------------------------------------------------------|
| HÄM_T1558      | Laacher See Tephra  | 12 937±23 cal. a BP<br>12 880±40 varve years BP                   | Bronk Ramsey <i>et al.</i> (2015a)<br>Brauer <i>et al.</i> (1999)                                 |
| HÄM_T1494      | Vedde Ash           | 12 023±43 cal. a BP<br>12 140±43 varve years BP<br>12 121±114 b2k | Bronk Ramsey <i>et al.</i> (2015a)<br>Lane <i>et al.</i> (2015)<br>Rasmussen <i>et al.</i> (2006) |
| HÄM_T1451      | Ulmener Maar Tephra | 11 000 varve years BP                                             | Brauer <i>et al.</i> (1999)                                                                       |
| HÄM_T1445-1444 | Askja-S Tephra      | 10 830±57 cal. a BP                                               | Bronk Ramsey <i>et al.</i> (2015a)                                                                |
| HÄM_T1401.5    | Saksunarvatn Ash    | 10 210±35 cal. a BP                                               | Lohne <i>et al.</i> (2014)                                                                        |

Maar tephra. These five correlations provide independent age estimates that are the first steps in building a chronology for the Lateglacial Hämelsee succession (Table 2).

As well as providing age estimates for the Hämelsee record, correlatives of the identified tephra deposits are also found in other Lateglacial terrestrial sites across Europe, allowing direct correlations to be made. Lake Hämelsee now forms a key tie point site and an important addition to the overall European tephrostratigraphical framework for the Lateglacial (Lowe *et al.* 2015; Fig. 6). Lake Hämelsee will play a key role in providing links between central and northern European sites and also with the Greenland ice-core records, which form the basis for the widely used INTIMATE event stratigraphy (Rasmussen *et al.* 2014).

When two or more tephras can be correlated to other sites, which is the case in this study, relative rates of change can be determined. This is due to the period of time between the two (or more) tephra isochronous markers being equal, allowing time-transgressive changes to be explored between sites. Of particular note is the presence of the LST, which lies within a varved section of the Hämelsee succession, and the Vedde Ash. Together these two deposits bracket the YD onset, pinpointing the timing of this important transition, meaning that the Hämelsee record may be precisely compared to other key archives such as Meerfelder Maar and Soppensee (Lane *et al.* 2011a, 2015) that also contain these tephra deposits. Thus, as further details on the local environment and regional climate are revealed from the Hämelsee record, along with a more

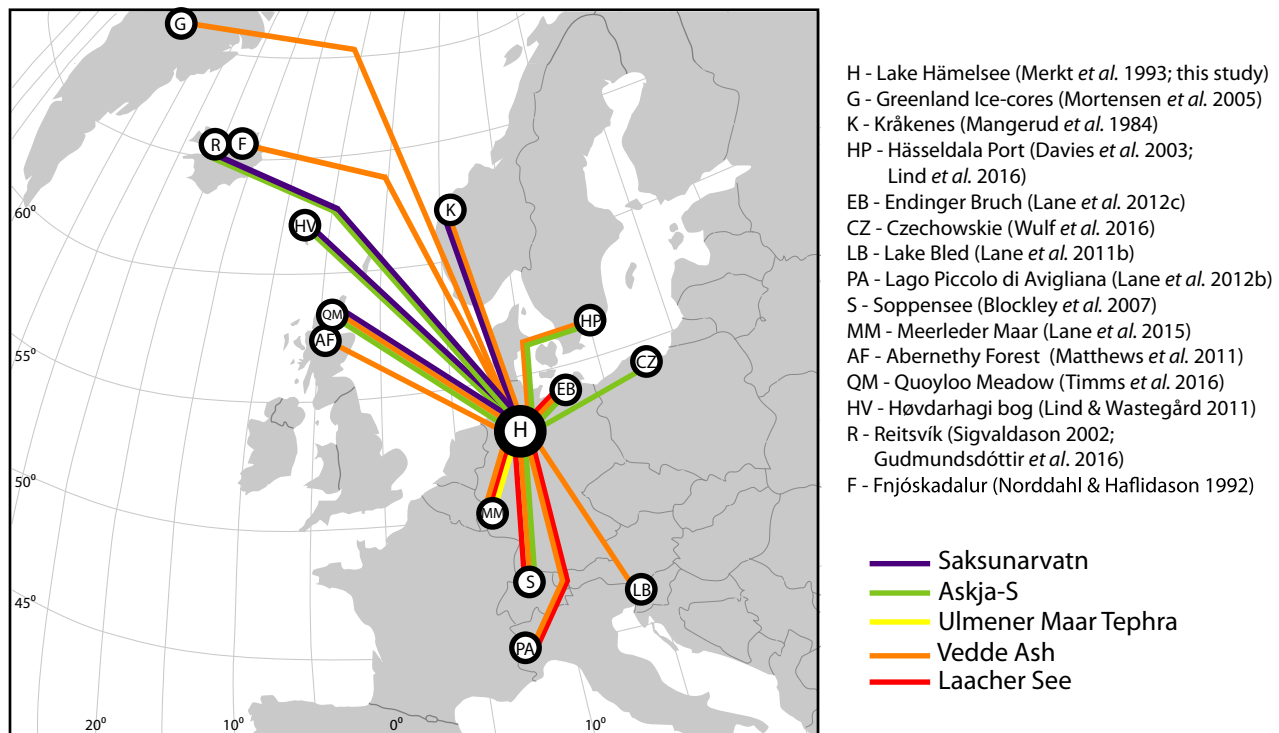

Fig. 6. Location map showing some of the key European terrestrial sites to which Lake Hämelsee can be correlated through one or more tephra deposits.

complete chronology, it will be possible to make an assessment of the synchronicity and nature of environmental responses to climate forcing within sites spanning central and northern Europe.

#### *Challenges of cryptotephra correlation*

The three remaining compositionally distinctive cryptotephra deposits (HÄM\_T 1616, HÄM\_T1470 and HÄM\_T1456-1455) have not been correlated to known eruptions. Known challenges of cryptotephra correlation include the repetition of tephra composition, the low shard concentrations and the effects of taphonomic processes.

*Repetition of tephra compositions.* – Tephra deposit HÄM\_T1616 has a chemical signature similar to the much studied Borrobol and Penifiler Tephra deposits (Fig. 4B), which have been described from distal sites in Scotland and Sweden. These two tephra deposits are known to be chemically indistinguishable (Pyne-O'Donnell *et al.* 2008; Matthews *et al.* 2011; Lind *et al.* 2016) and may only be differentiated based upon secure stratigraphical correlation. Both tephra deposits are found within the Lateglacial Interstadial, with the early interstadial BT pre-dating the PT. More recently there has been evidence of further Lateglacial-age cryptotephra deposits with the same glass shard composition. Some Scottish sites include a third tephra with this composition located in the glacial sediments prior to the interstadial (MacLeod *et al.* 2015), whereas Timms *et al.* (2016) discovered another two tephra deposits (QM1 213 and 218) with the same composition in the late interstadial in the Quooyloo Meadow site, in Orkney, Scotland. Based on its Allerød climatostratigraphical position, the best stratigraphical correlation for HÄM\_T1616 is to either QM1 213 or QM1 218 found in Orkney (Timms *et al.* 2016). With no sound compositional criteria, however, and without a more precise chronostratigraphy for the Hämelsee succession yet in place, correlation to any of the many Borrobol-like cryptotephra deposits has to remain uncertain. Our results corroborate previous studies (e.g. Lind *et al.* 2016) in demonstrating that further characterization of the suite of Borrobol-like tephra deposits found in Northern Europe is critical if they are to be used as precise chronostratigraphical marker horizons.

#### *Identifying low concentration cryptotephra horizons.* –

Tephra glass shards analysed from HÄM\_T1470 are chemically indistinguishable from HÄM\_T1494 (Vedde Ash; Fig. 4D), 23 cm below, and glass shards are found in all samples between these deposits. HÄM\_T1470 occurs above the onset of the Holocene in the Hämelsee succession (Fig. 2). Two stratigraphically separate tephra horizons with Vedde Ash-like chem-

istry are present in the Abernethy Forest record (Matthews *et al.* 2011). AF591 (early Younger Dryas) has been attributed to the widely distributed Vedde Ash, and AF555 (late Younger Dryas) is considered to represent a separate eruption (Abernethy Tephra). Two separate tephra horizons with compositions matching the rhyolitic phase of the Vedde Ash are also present at Muir Park Reservoir, Loch Etteridge, and Lochan an Druim in Scotland (MacLeod *et al.* 2015); however, the stratigraphical position of the younger tephra deposit correlated to AF555 is inconsistent, as it is seen both just above and just below the Younger Dryas to Holocene boundary. In assessing whether the HÄM\_T1470 could represent an occurrence of another, separate, Vedde Ash-like tephra deposit (~AF555), we need to consider the profile of tephra distribution in the core and the possible origin of the tephra shards found above HÄM\_T1494 (correlated to the Vedde Ash). In Hämelsee, a reduction in TSC is seen between HÄM\_T1470 and HÄM\_T1494, which could indicate that the small peak at 1470 cm was generated by the primary deposition of a second, compositionally indistinct, tephra deposit. If so, HÄM\_T1470 could well be correlated to the Abernethy Tephra (11 462±122 cal. a BP; Bronk Ramsey *et al.* 2015a). However, as described above, all small tephra peaks analysed between 1475–1449 cm contain shards of Vedde Ash composition, originating from the Katla volcanic system. This either indicates that the Katla volcano was very active during this period with several eruptions occurring or, a more plausible reason, it indicates evidence of reworking by bioturbation, turbidity or/and delayed in-washing of material from the catchment. Kleinmann *et al.* (2001) reported that Hämelsee underwent rapid lake level variations during the early Holocene, which could easily have led to sediment reworking. The reoccurrence of Vedde Ash chemistry shards throughout the early Holocene is also reported from Orkney, Scotland (Timms *et al.* 2016), where a high TSC peak for the Vedde Ash is also present. This may be due to secondary deposition of the Vedde Ash where shards were isolated or trapped in the surrounding catchment. Two glass shards that are indistinguishable to HÄM\_T1445-1444 have also been found in HÄM\_T1451 further suggesting these depths are subject to reworking.

The combination of the low TSC of HÄM\_T1470, its indistinct composition, its position in an interval that is characterized by relatively abundant shards of reworked Vedde Ash material (HÄM\_T1494) and the many eruptions of Vedde Ash-like tephra from Katla reported in the literature (Lane *et al.* 2012a; MacLeod *et al.* 2015), means that we are unable to prove a firm correlation of HÄM\_T1470 to a specific eruption event and believe, most likely, that it represents reworking of Vedde Ash material.

### *Tephra deposition and taphonomic processes*

There is a significant difference between the TSCs of the tephra deposits observed in core H1 and H2. Comparing both the low and high-resolution samples shown in Fig. 2, TSCs are consistently higher in H2 than in H1. Both cores were retrieved from the middle of the lake and within 10 m of each other. These results show that TSCs are not constant over the profile of the lake. Even within 10 horizontal metres, a significant difference can be seen. This is exemplified by the difference in thickness of the LST tephra in these latest cores compared with those studied by Merkt & Müller (1999).

There are a number of possible explanations for the differences in TSC that are observed between the two cores. These include taphonomic processes such as deposition onto an uneven lake bed at the time of tephra deposition and patchy distribution on the lake bed due to within-basin focussing and redistribution of tephra shards. Such variation in tephra distribution and thickness has been observed before. For example, differences of >20 cm in the thickness of a visible tephra have been observed within cores taken from different areas of lake Kråkenes (Mangerud *et al.* 1984). Many factors, such as the depth and size of the lake and its susceptibility to wind, sedimentation rates and catchment inlets (e.g. Boyle 1999; Pyne-O'Donnell 2011) may cause patchy or uneven tephra deposition within lake systems. The proximity of the two cores collected from Hämelsee would suggest that within-basin particle redistribution was in some way responsible for the difference in TSC. The implications for cryptotephra studies are important: no single core may be perfectly representative of the full sediment record at a site. Studies like ours, where two parallel successions can be investigated, increase the chances of recording a complete succession and provide detailed valuable insights into the variability of sedimentation within a lake basin.

### **Conclusions**

In total, eight tephra horizons have been discovered from the Lake Hämelsee record spanning the Lateglacial and early Holocene sediments, five of which have been confidently correlated to known eruptions. These are the c. 12.1 ka BP Vedde Ash, the c. 11 ka BP Ulmener Maar tephra and the c. 10.8 ka BP Askja-S Tephra in addition to the c. 12.9 ka BP Laacher See Tephra and the c. 10.3 ka BP Saksunarvatn Ash previously identified by Merkt *et al.* (1993). The remaining three cryptotephra, one found within the late interstadial and two deposits in the early Holocene sediments, have not been correlated to any known eruption at present. Despite the challenges of identifying cryptotephra deposits in very low concentrations, our results provide five independent age estimates for the Hämelsee record, as well as acting as time-synchronous markers to precisely correlate the Hämelsee

succession to other key archives across Europe and the North Atlantic. The Hämelsee succession is now established as an important site within the wider European tephra framework for the Lateglacial and early Holocene period. As further palaeoecological and sedimentological data on the Hämelsee record emerge, the secure anchoring and dating of the succession will ensure that it becomes a key archive of both local and regional environmental change in response to the climatic oscillations of the Lateglacial.

*Acknowledgements.* – This study makes a contribution to the INTIMATE project (INTEgrating Ice core, MARine and TERrestrial records, <http://intimate.nbi.ku.dk/>) and follows on from the INTIMATE Example 2013 Research and Training school, which was funded by COST action ES0907. We thank all of the participants in the INTIMATE Example 2013 training school for their contribution to this research, as well as Camping Rittergut Hämelsee and the fantastic coring team from Utrecht University: Hans van Aken, David Maas, Hessel Woolderink and Tom Peters (University of Amsterdam). We thank Dr Chris Hayward for his assistance with the use of the electron microprobe at the Tephrochronology Analytical Unit, University of Edinburgh. Paul Albert, Gareth James, Peter Abbott and Anna Bourne (Swansea University tephra group) are also thanked for laboratory assistance and advice. Esther Gudmundsdóttir, Sean Pyne-O'Donnell and Jan A. Piotrowski are thanked for their constructive review comments. The research was conducted as part of G. Jones' Ph.D., which is funded by the Coleg Cymraeg Cenedlaethol. The paper is dedicated to our late colleague, and co-author, Dr Falko Turner.

### **References**

- Barton, R. N. E., Lane, C. S., Albert, P. G., White, D., Colcutt, S. N., Bouzouggar, A., Ditchfield, P., Farr, L., Oh, A., Ottoloni, L., Smith, V. C., van Peer, P. & Kindermann, K. 2015: The role of cryptotephra in refining the chronology of Late Pleistocene human evolution and cultural change in North Africa. *Quaternary Science Reviews* 118, 151–169.
- Blaauw, M., Wohlfarth, B., Christen, J. A., Ampel, L., Veres, D., Hughen, K. A., Preusser, F. & Svensson, A. 2010: Were last glacial climate events simultaneous between Greenland and France? A quantitative comparison using non-tuned chronologies. *Journal of Quaternary Science* 25, 387–394.
- Blockley, S. P. E., Lane, C. S., Hardiman, M., Rasmussen, S. O., Seierstad, I. K., Steffensen, J. P., Svensson, A., Lotter, A. F., Turney, C. S. M., Bronk Ramsey, C. & INTIMATE members 2012: Synchronisation of palaeoenvironmental records over the last 60,000 years, and an extended INTIMATE event stratigraphy to 48,000 b2k. *Quaternary Science Reviews* 36, 2–10.
- Blockley, S. P. E., Lane, C. S., Lotter, A. F. & Pollard, A. M. 2007: Evidence for the presence of the Vedde Ash in Central Europe. *Quaternary Science Reviews* 26, 3030–3036.
- Blockley, S. P. E., Pyne-O'Donnell, S. D. F., Lowe, J. J., Matthews, I. P., Stone, A., Pollard, A. M., Turney, C. S. M. & Molyneux, E. G. 2005: A new and less destructive laboratory procedure for the physical separation of distal glass tephra shards from sediments. *Quaternary Science Reviews* 24, 1952–1960.
- van den Bogaard, P. & Schmincke, H. U. 1985: Laacher See tephra: a widespread isochronous late Quaternary tephra layer in Central and Northern Europe. *Geological Society of America Bulletin* 96, 1554–1571.
- Boyle, J. 1999: Variability of tephra in lake and catchment sediments, Svinavatn, Iceland. *Global and Planetary Change* 21, 129–149.
- Bramham-Law, C. W. F., Theuerkauf, M., Lane, C. S. & Mangerud, J. 2013: New findings regarding the Saksunarvatn Ash in Germany. *Journal of Quaternary Science* 28, 248–257.



- Brauer, A., Endres, C. & Negendank, J. F. 1999: Lateglacial calendar year chronology based on annually laminated sediments from Lake Meerfelder Maar, Germany. *Quaternary International* 61, 17–25.
- Bronk Ramsey, C., Albert, P. G., Blockley, S. P. E., Hardiman, M., Housley, R. A., Lane, C. S., Lee, S., Matthews, I. P., Smith, V. C. & Lowe, J. J. 2015a: Improved age estimates for key Late Quaternary European tephra horizons in the RESET lattice. *Quaternary Science Reviews* 118, 18–32.
- Bronk Ramsey, C., Housley, R. A., Lane, C. S., Smith, V. C. & Pollard, A. M. 2015b: The RESET tephra database and associated analytical tools. *Quaternary Science Reviews* 118, 33–47.
- Davies, S. M. 2015: Cryptotephra: the revolution in correlation and precision dating. *Journal of Quaternary Science* 30, 114–130.
- Davies, S. M., Abbott, P. M., Pearce, N. J. G., Wastegård, S. & Blockley, S. P. E. 2012: Integrating the INTIMATE records using tephrochronology: rising to the challenge. *Quaternary Science Reviews* 36, 11–27.
- Davies, S. M., Wastegård, S. & Wohlfarth, B. 2003: Extending the limits of the Borrobol Tephra to Scandinavia and detection of new early Holocene tephra. *Quaternary Research* 59, 345–352.
- Fontijn, K., Lachowycz, S. M., Rawson, H., Pyle, D. M., Mather, T. A., Naranjo, J. A. & Moreno-Roa, H. 2014: Late Quaternary tephrostratigraphy of southern Chile and Argentina. *Quaternary Science Reviews* 89, 70–84.
- Grange, L. I. 1931: Volcanic ash showers. *New Zealand Journal of Science and Technology* 12, 228–240.
- Grönvold, K., Óskarsson, N., Johnsen, S. J., Clausen, H. B., Hammer, C. U., Bond, G. & Bard, E. 1995: Ash Layers from Iceland in the Greenland GRIP ice core correlated with oceanic and land sediments. *Earth and Planetary Science Letters* 135, 149–155.
- Gudmundsdóttir, E. R., Larsen, G., Björck, S., Ingólfsson, Ó. & Striberger, J. 2016: A new high-resolution Holocene tephra stratigraphy in eastern Iceland: improving the Icelandic and North Atlantic tephrochronology. *Quaternary Science Reviews* 150, 234–249.
- Hayward, C. 2012: High spatial resolution electron probe microanalysis of tephra and melt inclusions without beam-induced chemical modification. *Holocene* 22, 119–125.
- Heiri, O., Lotter, A. F. & Lemcke, G. 2001: Loss on ignition as a method for estimating organic and carbonate content in sediments: reproducibility and comparability of results. *Journal of Paleolimnology* 25, 101–110.
- Housley, R. A., MacLeod, A., Nalepka, D., Jurochnik, A., Masojc, M., Davies, L., Lincoln, P. C., Bronk Ramsey, C., Gamble, C. S. & Lowe, J. J. 2013: Tephrostratigraphy of a Lateglacial lake sediment sequence at Wegliny, southwest Poland. *Quaternary Science Reviews* 77, 4–18.
- Jensen, B. J. L., Pyne-O'Donnell, S., Plunkett, G., Froese, D. G., Hughes, P. D. M., Sigl, M., McConnell, J. R., Amesbury, M. J., Blackwell, P. G., van den Bogaard, C., Buck, C. E., Charman, D. J., Clague, J. J., Hall, V. A., Koch, J., Mackay, H., Mallon, G., Mccoll, L. & Pilcher, J. R. 2014: Transatlantic distribution of the Alaskan White River Ash. *Geology* 42, 875–878.
- Kleinmann, A., Merkt, J. & Müller, H. 2001: Rapid short term variations and response of proxies during the older Holocene. *Terra Nostra* 3, 112–114.
- Kuehn, S. C., Froese, D. G., Shane, P. A. R. & INTAV Intercomparison Participants 2011: The INTAV intercomparison of electron-beam microanalysis of glass by tephrochronology laboratories: results and recommendations. *Quaternary International* 246, 19–47.
- Lacasse, C., Sigurdsson, H., Johannesson, H., Paterne, M. & Carey, S. 1995: Source of Ash Zone 1 in the North Atlantic. *Bulletin of Volcanology* 57, 18–32.
- Lane, C. S., Andrić, M., Cullen, V. L. & Blockley, S. P. E. 2011b: The occurrence of distal Icelandic and Italian tephra in the Lateglacial of Lake Bled, Slovenia. *Quaternary Science Reviews* 30, 1013–1018.
- Lane, C. S., Blockley, S. P. E., Bronk Ramsey, C. & Lotter, A. F. 2011a: Tephrochronology and absolute centennial scale synchronisation of European and Greenland records for the last glacial to interglacial transition: a case study of Soppensee and NGRIP. *Quaternary International* 246, 145–156.
- Lane, C. S., Blockley, S. P. E., Lotter, A. F., Finsinger, W., Filippi, M. L. & Matthews, I. P. 2012b: A regional tephrostratigraphic framework for central and southern European climate archives during the Last Glacial to Interglacial transition: comparisons north and south of the Alps. *Quaternary Science Reviews* 36, 50–58.
- Lane, C. S., Blockley, S. P. E., Mangerud, J., Smith, V. C., Lohne, Ø. S., Tomlinson, E., Matthews, I. P. & Lotter, A. F. 2012a: Was the 12.1 ka Icelandic Vedde Ash one of a kind? *Quaternary Science Reviews* 33, 87–99.
- Lane, C. S., Brauer, A., Blockley, S. P. E. & Dulski, P. 2013: Volcanic ash reveals time-transgressive abrupt climate change during the Younger Dryas. *Geology* 41, 1251–1254.
- Lane, C. S., Brauer, A., Martin-Puertas, C., Blockley, S. P. E., Smith, V. C. & Tomlinson, E. L. 2015: The Late Quaternary tephrostratigraphy of annually laminated sediments from Meerfelder Maar, Germany. *Quaternary Science Reviews* 122, 192–206.
- Lane, C. S., Cullen, V. L., White, D., Bramham-Law, C. W. F. & Smith, V. C. 2014: Cryptotephra as a dating and correlation tool in archaeology. *Journal of Archaeological Science* 42, 42–50.
- Lane, C. S., De Klerk, P. & Cullen, V. L. 2012c: A tephrochronology for the Lateglacial palynological record of the Endinger Bruch (Vorpommern, north-east Germany). *Journal of Quaternary Science* 27, 141–149.
- Le Bas, M. J., Le Maitre, R., Streckeisen, A. & Zanettin, B. 1986: A chemical classification of volcanic rocks based on the total alkali-silica diagram. *Journal of Petrology* 27, 745–750.
- Lind, E. M. & Wastegård, S. 2011: Tephra horizons contemporary with short early Holocene climate fluctuations: new results from the Faroe Islands. *Quaternary International* 246, 157–167.
- Lind, E. M., Lilja, C., Wastegård, S. & Pearce, N. J. G. 2016: Revisiting the Borrobol Tephra. *Boreas* 45, 629–643.
- Lohne, Ø. S., Mangerud, J. & Birks, H. H. 2014: IntCal13 calibrated ages of the Vedde and Saksunarvatn ashes and the Younger Dryas boundaries from Kråkenes, western Norway. *Journal of Quaternary Science* 29, 506–507.
- Lowe, D. J. 2011: Tephrochronology and its application: a review. *Quaternary Geochronology* 6, 107–153.
- Lowe, J. J., Bronk Ramsey, C., Housley, R. A., Lane, C. S., Tomlinson, E. L., RESET Team & RESET Associates 2015: The RESET project: constructing a European tephra lattice for refined synchronisation of environmental and archaeological events during the last c. 100 ka. *Quaternary Science Reviews* 118, 1–17.
- Lowe, J. J., Rasmussen, S. O., Björck, S., Hoek, W. Z., Steffensen, J. P., Walker, M. J. C., Yu, Z. C. & the INTIMATE group 2008: Synchronisation of palaeoenvironmental events in the North Atlantic region during the Last Termination: a revised protocol recommended by the INTIMATE group. *Quaternary Science Reviews* 27, 6–17.
- MacLeod, A., Brunnberg, L., Wastegård, S., Hang, T. & Matthews, I. P. 2014: Lateglacial cryptotephra detected within clay varves in Östergötland, south-east Sweden. *Journal of Quaternary Science* 29, 605–609.
- MacLeod, A., Matthews, I. P., Lowe, J. J., Palmer, A. P. & Albert, P. G. 2015: A second tephra isochron for the Younger Dryas period in northern Europe: the Abernethy Tephra. *Quaternary Geochronology* 28, 1–11.
- Mangerud, J., Furnes, H. & Jóhansen, J. 1986: A 9000-year-old ash bed on the Faroe islands. *Quaternary Research* 26, 262–265.
- Mangerud, J., Lie, S. E., Furnes, H., Krisiansen, I. L. & Lomo, L. 1984: A Younger Dryas Ash Bed in western Norway, and its possible correlations with tephra in cores from the Norwegian sea and the North Atlantic. *Quaternary Research* 21, 85–104.
- Matthews, I. P., Birks, H. H., Bourne, A. J., Brooks, S. J., Lowe, J. J., MacLeod, A. & Pyne-O'Donnell, S. D. F. 2011: New age estimates and climatostratigraphic correlations for the Borrobol and Penifiler Tephra: evidence from Abernethy Forest, Scotland. *Journal of Quaternary Science* 26, 247–252.
- Merkt, J. & Müller, H. 1999: Varve chronology and palynology of the Lateglacial in Northwest Germany from lacustrine sediments of Hämelsee in Lower Saxony. *Quaternary International* 61, 41–59.
- Merkt, J., Müller, H., Knabe, W., Müller, P. & Weiser, T. 1993: The early Holocene Saksunarvatn tephra found in lake sediments in NW Germany. *Boreas* 22, 93–100.



- Mortensen, A. K., Bigler, M., Grönvold, K., Steffensen, J. P. & Johnsen, S. J. 2005: Volcanic ash layers from the Last Glacial Termination in the NGRIP ice core. *Journal of Quaternary Science* 20, 209–219.
- Newton, A. J., Dugmore, A. J. & Gittings, B. M. 2007: Tephabase: tephrochronology and the development of a centralised European database. *Journal of Quaternary Science* 22, 737–743.
- Norrdahl, H. & Hafliðason, H. 1992: The Skógar Tephra, a Younger Dryas marker in North Iceland. *Boreas* 21, 23–41.
- Ott, F., Wulf, S., Serb, J., Słowiński, M., Obremaska, M., Tjallingii, R., Błaszkiwicz, M. & Brauer, A. 2016: Constraining the time span between the Early Holocene Hasseldalen and Askja-S Tephra through varve counting in the Lake Czechowskie sediment record, Poland. *Journal of Quaternary Science* 31, 103–113.
- Pyne-O'Donnell, S. D. F. 2011: The taphonomy of Last Glacial-Interglacial Transition (LGIT) distal volcanic ash in small Scottish lakes. *Boreas* 40, 131–145.
- Pyne-O'Donnell, S. D. F., Blockley, S. P. E., Turney, C. S. M. & Lowe, J. J. 2008: Distal volcanic ash layers in the Lateglacial Interstadial (GI-1): problems of stratigraphic discrimination. *Quaternary Science Reviews* 27, 72–84.
- Rach, O., Brauer, A., Wilkes, H. & Sachse, D. 2014: Delayed hydrological response to Greenland cooling at the onset of the Younger Dryas in western Europe. *Nature Geoscience* 7, 109–112.
- Rasmussen, S. O., Andersen, K. K., Svensson, A. M., Steffensen, J. P., Vinther, B. M., Clausen, H. B., Siggaard-Andersen, M. L., Johnsen, S. J., Larsen, L. B., Dahl-Jensen, D., Bigler, M., Röthlisberger, R., Fischer, H., Goto-Azuma, K., Hansson, M. E. & Ruth, U. 2006: A new Greenland ice core chronology for the last glacial termination. *Journal of Geophysical Research-Atmospheres* 111, D06102, doi:10.1029/2005JD006079.
- Rasmussen, S. O., Bigler, M., Blockley, S. P. E., Blunier, T., Buchardt, S. L., Clausen, H. B., Cvijanovic, I., Dahl-Jensen, D., Johnsen, S. J., Fischer, H., Gkinis, V., Guillevic, M., Hoek, W. Z., Lowe, J. J., Pedro, J. B., Popp, T., Seierstad, I. K., Steffensen, J. P., Svensson, A. M., Vallelonga, P., Vinther, B. M., Walker, M. J. C., Wheatley, J. J. & Winstrup, M. 2014: A stratigraphic framework for abrupt climatic changes during the Last Glacial period based on three synchronized Greenland ice-core records: refining and extending the INTIMATE event stratigraphy. *Quaternary Science Reviews* 106, 14–28.
- Rasmussen, T. L., Thomsen, E., Nielsen, T. & Wastegård, S. 2011: Atlantic surface water inflow to the Nordic seas during the Pleistocene-Holocene transition (mid-late Younger Dryas and Pre-Boreal periods, 12 450–10 000 a BP). *Journal of Quaternary Science* 26, 723–733.
- Riede, F., Bazely, O., Newton, A. J. & Lane, C. S. 2011: A Laacher See eruption supplement to Tephabase: investigating distal tephra fallout dynamics. *Quaternary International* 246, 134–144.
- Ruddiman, W. F. & Glover, L. K. 1972: Vertical mixing of ice-rafted volcanic ash in north Atlantic sediments. *Geological Society of America Bulletin* 83, 2817–2836.
- Sigvaldason, G. E. 2002: Volcanic and tectonic processes coinciding with glaciation and crustal rebound, an early Holocene rhyolitic eruption in the Dyngjufjöll volcanic centre and the formation of the Askja caldera, north Iceland. *Bulletin of Volcanology* 64, 192–205.
- Thórarinnsson, S. 1944: Tefrokronologiska studier på Island. *Geografiska Annaler* 26, 1–217.
- Timms, R. G. O., Matthews, I. P., Palmer, A. P., Candy, I. & Abel, L. 2016: A high-resolution tephrostratigraphy from Quoyloo Meadow, Orkney, Scotland: implications for the tephrostratigraphy of NW Europe during the Last Glacial-Interglacial Transition. *Quaternary Geochronology* (2016), <http://dx.doi.org/10.1016/j.quageo.2016.06.004>.
- Turney, C. S. M. 1998: Extraction of rhyolitic component of Vedde microtephra from minerogenic lake sediments. *Journal of Paleolimnology* 19, 199–206.
- Turney, C. S. M., Harkness, D. D. & Lowe, J. J. 1997: The use of microtephra horizons to correlate Late-glacial lake sediment successions in Scotland. *Journal of Quaternary Science* 12, 525–531.
- Turney, C. S. M., Lowe, J. J., Davies, S. M., Hall, V., Lowe, D. J., Wastegård, S., Hoek, W. Z., Alloway, B. & SCOTAV and INTIMATE Members 2004: Tephrochronology of Last Termination Sequences in Europe: a protocol for improved analytical precision and robust correlation procedures (a joint SCOTAV-INTIMATE proposal). *Journal of Quaternary Science* 19, 111–120.
- Uragami, K., Naganuma, I. & Togashi, I. 1933: Studies on the volcanic ashes in Hokkaido. *Bulletin of the Volcanological Society of Japan* 1, 81–94.
- Waagstein, R. & Jóhansen, J. 1968: Tre vulkanska askelag fra faeroerne. *Meddelelser fra Dansk Geologisk Forening* 18, 1–8.
- Wulf, S., Dräger, N., Ott, F., Serb, J., Appelt, O., Guðmundsdóttir, E., van den Bogaard, C., Słowiński, M., Błaszkiwicz, M. & Brauer, A. 2016: Holocene tephrostratigraphy of varved sediment records from Lakes Tiefer See (NE Germany) and Czechowskie (N Poland). *Quaternary Science Reviews* 132, 1–14.
- Wulf, S., Ott, F., Słowiński, M., Noryśkiewicz, A. M., Dräger, N., Martín-Puertas, C., Czymzik, M., Neugebauer, I., Dulski, P., Bourne, A. J., Błaszkiwicz, M. & Brauer, A. 2013: Tracing the Laacher See Tephra in the varved sediment record of the Trzechowskie palaeolake in central Northern Poland. *Quaternary Science Reviews* 76, 129–139.
- Zolitschka, B., Negendank, J. F. W. & Lottermoser, B. G. 1995: Sedimentological proof and dating of the early Holocene volcanic eruption of Ulmener Maar (Vulkaneifel, Germany). *Geologische Rundschau* 84, 213–219.

## Supporting Information

Additional Supporting Information may be found in the online version of this article at <http://www.boreas.dk>.

*Table S1.* Major element geochemistry for all tephras analysed in this study.

*Table S2.* Lipari and BCR2g secondary standards data.

*Fig. S1.* Selected bi-plots showing tephra glass shard major element compositions for tephra layers HÄM\_T1616 and HÄM\_T1445–1444. Comparisons are made between the 5- and 3-µm beam setups revealing no offsets.
